# Supplementary material for: A Recombinant Baculovirus Efficiently Generates Recombinant Adeno-Associated Virus Vectors in Cultured Insect Cells and Larvae
Source: PubMed Central journal article supplement — Mol Ther Methods Clin Dev. 2018 Jul 4;10:38–47. doi: 10.1016/j.omtm.2018.05.005 (PMC6034586; doi:10.1016/j.omtm.2018.05.005), 2018-07-04
Supplement: mmc1.pdf [file mmc1.pdf]

**OMTM, Volume 10**

**Supplemental Information**

**A Recombinant Baculovirus Efficiently Generates  
Recombinant Adeno-Associated Virus Vectors  
in Cultured Insect Cells and Larvae**

**Yang Wu, Liangyu Jiang, Hao Geng, Tian Yang, Zengpeng Han, Xiaobing He, Kunzhang Lin, and Fuqiang Xu**

## Supplemental Information

**Table S1. Primers for cloning and Q-PCR.**

| Primer     | 5'-sequence-3'                                       |
|------------|------------------------------------------------------|
| Cap2-Xma-F | TGCCCCCGGGCCGCCACGGCTGCCGACGGTTATCTACCCGATTGGCT<br>C |
| Cap2-Nhe-R | TGCCGCTAGCTTACAGATTACGAGTCAGGTATCTGG                 |
| Cap8-Xma-F | The same as Cap2-Xma-F                               |
| Cap8-Nhe-R | TGCCGCTAGCTTACAGATTACGGGTGAGGTAAC                    |
| Cap9-Xma-F | The same as Cap2-Xma-F                               |
| Cap9-Nhe-R | The same as Cap2-Nhe-R                               |
| Rep-Bgl-F  | TGAAGATCTGCCGCCCTGGCGGGGTTTTAC                       |
| Rep-Spe-F  | CGGACTAGTATATTAATAGATCATGGAGATAATT                   |
| Rep-Xba-R  | TGCTCTAGATTATTGTTCAAAGATGCAGTCATCC                   |
| ITR-KpnM-F | ATGGTACC TCCGGACCTCTGACTTGAGCGTCGAT                  |
| Sac1-R     | TGACGGTTCATAAACGAGCTCTG                              |
| Kpn-Sac1-F | TAGGTACC GAGCTCGTTTAGTGAACCGT                        |
| ITR-SpeM-R | TATCCGGACTAGTACTATGGTTGCTTTGACGT                     |
| EcoR-GFP-F | ACTGGAATTCATGGTGAGCAAGGGCGAGGAG                      |
| GFP-BamH-R | CAGTGGATCCTTACTTGTACAGCTCGTCCATGCC                   |
| Bac-F      | CCGTAACGGACCTCGTACTT                                 |
| Bac-R      | CCGTTGGGATTTGTGGTAAC                                 |
| CMV-F      | TCCGCGTTACATAACTTACGG                                |
| CMV-R      | GGGCGTACTTGGCATATGAT                                 |

Restriction enzyme sites are underlined. F: Forward, R: Reverse.
